# Supplementary material
Source: publisher site journal article supplement (https://oneecosystem.pensoft.net/article/download/suppl/5751995/)
Supplement: Supplementary file 1

**Appendix A. Specification of used data and legend of all used spatial layers**

| <b>No.</b> | <b>Abbrev.</b>    | <b>Data layer</b>                                 |
|------------|-------------------|---------------------------------------------------|
| 1          | <b>01_INCL</b>    | Slope inclination                                 |
| 2          | <b>02_REL</b>     | Morphological-positional type of relief           |
| 3          | <b>03_HGREG</b>   | Hydrogeological regionalization                   |
| 4          | <b>04_TEMP</b>    | Average length of vegetation season               |
| 5          | <b>05_RAIN</b>    | Rainfall intensity (max. 24 hour totals)          |
| 6          | <b>06_MOIST</b>   | Moisture balance indicator                        |
| 7          | <b>07_RAD</b>     | Average annual amount of solar radiation          |
| 8          | <b>08_CLIM</b>    | Classification of climate                         |
| 9          | <b>09_BASIN</b>   | Hydrological basins (watersheds)                  |
| 10         | <b>10_WATBOD</b>  | Watercourses and water bodies                     |
| 11         | <b>11_WATRES1</b> | Drinking groundwater resources                    |
| 12         | <b>12_WATRES2</b> | Drinking groundwater protection zones             |
| 13         | <b>13_DRINK1</b>  | Surface drinking water sources                    |
| 14         | <b>14_DRINK2</b>  | Surface drinking water basins                     |
| 15         | <b>15_MEDIC</b>   | Natural medicinal resources protection zones      |
| 16         | <b>16_WATPROT</b> | Protected water management areas                  |
| 17         | <b>17_GRWAT</b>   | Average groundwater depth                         |
| 18         | <b>18_SSUB</b>    | Soil subtype                                      |
| 19         | <b>19_STEX</b>    | Soil texture                                      |
| 20         | <b>20_SDEP</b>    | Soil depth                                        |
| 21         | <b>21_LAND</b>    | Current landscape structure / land use            |
| 22         | <b>22_DIVER</b>   | Spatial diversity of landscape structure          |
| 23         | <b>23_FOR1</b>    | Classification of forests                         |
| 24         | <b>24_FOR2</b>    | Forest functional categories                      |
| 25         | <b>25_FORAGE</b>  | Forest age                                        |
| 26         | <b>26_ECOSYS</b>  | Significant ecosystems (habitats)                 |
| 27         | <b>27_NATUR</b>   | The naturalness of ecosystems                     |
| 28         | <b>28_STATE</b>   | State of ecosystems                               |
| 29         | <b>29_NATPR</b>   | Categorization of protected areas                 |
| 30         | <b>30_SIGNIF</b>  | Natural conservation significance of a territory  |
| 31         | <b>31_LEAF</b>    | Leaf area index (LAI)                             |
| 32         | <b>32_FAPAR</b>   | Photosynthetically active radiation (FAPAR)       |
| 33         | <b>33_NDVI</b>    | Normalized difference vegetation index (NDVI)     |
| 34         | <b>34_THERM</b>   | Landscape potential for geothermal energy         |
| 35         | <b>35_HUNT</b>    | Fishing and hunting areas                         |
| 36         | <b>36_HIST</b>    | Areas of traditional (historical) land use        |
| 37         | <b>37_GEOL</b>    | Significant geological and geomorphological sites |
| 38         | <b>38_PARKS</b>   | Historical parks and gardens                      |
| 39         | <b>39_ATTRAC</b>  | Cultural and historical attractions and monuments |
| 40         | <b>40_RECR</b>    | Recreation and tourism objects                    |

|                |                                                                                               |
|----------------|-----------------------------------------------------------------------------------------------|
| <b>01_INCL</b> | <b>Slope inclination</b>                                                                      |
| Data source    | Database of Constantine the Philosopher University (primary source – Digital elevation model) |
| Data accuracy  | 1:25,000                                                                                      |
| Units          | Degrees                                                                                       |
| Min / Max *    | 0 / 42.773                                                                                    |
| Legend         | Individual values of slope inclination for all pixels, based on digital elevation model.      |

|               |                                                                                                                                                                                                                                                                                                                                                                                                                                                                                                                                                                                                                                                                                                                                                                                                                                                                                                                                                                                                                                                                                                                                                                                                                                            |
|---------------|--------------------------------------------------------------------------------------------------------------------------------------------------------------------------------------------------------------------------------------------------------------------------------------------------------------------------------------------------------------------------------------------------------------------------------------------------------------------------------------------------------------------------------------------------------------------------------------------------------------------------------------------------------------------------------------------------------------------------------------------------------------------------------------------------------------------------------------------------------------------------------------------------------------------------------------------------------------------------------------------------------------------------------------------------------------------------------------------------------------------------------------------------------------------------------------------------------------------------------------------|
| <b>02_REL</b> | <b>Morphological-positional type of relief</b>                                                                                                                                                                                                                                                                                                                                                                                                                                                                                                                                                                                                                                                                                                                                                                                                                                                                                                                                                                                                                                                                                                                                                                                             |
| Data source   | Database of Institute of Landscape Ecology SAS                                                                                                                                                                                                                                                                                                                                                                                                                                                                                                                                                                                                                                                                                                                                                                                                                                                                                                                                                                                                                                                                                                                                                                                             |
| Data accuracy | 1:25,000                                                                                                                                                                                                                                                                                                                                                                                                                                                                                                                                                                                                                                                                                                                                                                                                                                                                                                                                                                                                                                                                                                                                                                                                                                   |
| Units         | Qualitative categories – types of relief                                                                                                                                                                                                                                                                                                                                                                                                                                                                                                                                                                                                                                                                                                                                                                                                                                                                                                                                                                                                                                                                                                                                                                                                   |
| Min / Max *   | 36 categories (1-36)                                                                                                                                                                                                                                                                                                                                                                                                                                                                                                                                                                                                                                                                                                                                                                                                                                                                                                                                                                                                                                                                                                                                                                                                                       |
| Legend        | <p>Categories of relief types:</p> <ol style="list-style-type: none"> <li>1. Flat peak</li> <li>2. Peak platform</li> <li>3. Cone peak</li> <li>4. Ridge</li> <li>5. U-valley (as a whole)</li> <li>6. U-valley bottom</li> <li>7. River valley bottom</li> <li>8. River valley (as a whole)</li> <li>9. Slope – transport part</li> <li>10. Slope platform</li> <li>11. Accumulation plain</li> <li>12. Undulated plain (sand dune)</li> <li>13. River terrace</li> <li>14. Gully</li> <li>15. Rock cliff</li> <li>16. Strongly undulated slope</li> <li>17. Dissected slope with gullies</li> <li>18. Wide river floodplain</li> <li>19. Narrow river floodplain</li> <li>20. Alluvial cone</li> <li>21. Karst sinkhole</li> <li>22. River deadarm</li> <li>23. River bed recessed</li> <li>24. Foothill slope</li> <li>25. Significant floodplain elevation</li> <li>26. Bottom of waterlogged depression</li> <li>27. Saddle</li> <li>28. Landslide</li> <li>29. Terraced slope</li> <li>30. Bottom of water body</li> <li>31. Anthropogenic form of relief</li> <li>32. Debris falls and rock- surface</li> <li>33. Glacial valley-end</li> <li>34. Glacial troge</li> <li>35. Glacial morraine</li> <li>36. Mountain peak</li> </ol> |

|                 |                                                                     |
|-----------------|---------------------------------------------------------------------|
| <b>03_HGREG</b> | <b>Hydrogeological regionalization</b>                              |
| Data source     | Database of Institute of Landscape Ecology SAS                      |
| Data accuracy   | 1:50,000                                                            |
| Units           | Qualitative categories – based on productivity of grounwater levels |
| Min / Max *     | 7 categories                                                        |

|        |                                                                                                                                                                                                                                                                                                                                                                  |
|--------|------------------------------------------------------------------------------------------------------------------------------------------------------------------------------------------------------------------------------------------------------------------------------------------------------------------------------------------------------------------|
| Legend | <p>Categories of hydro-geological regions of Slovakia, based on the average usable resources of groundwater:</p> <p>1 – very low (to 0.2 l/sec/km<sup>2</sup>)</p> <p>2 – low (0.2-0.5)</p> <p>3 – relatively low (0.5-1)</p> <p>4 – average (1-2)</p> <p>5 – above average (2-5)</p> <p>6 – high (5-10)</p> <p>8 – very high (over 10 l/sec/km<sup>2</sup>)</p> |
|--------|------------------------------------------------------------------------------------------------------------------------------------------------------------------------------------------------------------------------------------------------------------------------------------------------------------------------------------------------------------------|

|                |                                                                                                                                                                                    |
|----------------|------------------------------------------------------------------------------------------------------------------------------------------------------------------------------------|
| <b>04_TEMP</b> | <b>Average length of vegetation season</b>                                                                                                                                         |
| Data source    | Slovak Hydrometeorological Institute – Climate Atlas of Slovakia                                                                                                                   |
| Data accuracy  | 1:50,000                                                                                                                                                                           |
| Units          | Days annualy                                                                                                                                                                       |
| Min / Max *    | - 15.3 / 193.9                                                                                                                                                                     |
| Legend         | <p>Average length of vegetation season (number of days with the average temperature over 10 °C)</p> <p>Individual values for all pixels based on Climate Atlas spatial layers.</p> |

|                |                                                                                                                                       |
|----------------|---------------------------------------------------------------------------------------------------------------------------------------|
| <b>05_RAIN</b> | <b>Rainfall intensity (max. 24 hour totals)</b>                                                                                       |
| Data source    | Slovak Hydrometeorological Institute – Climate Atlas of Slovakia                                                                      |
| Data accuracy  | 1:50,000                                                                                                                              |
| Units          | Millimeters per day                                                                                                                   |
| Min / Max *    | 53.3 / 135.0                                                                                                                          |
| Legend         | <p>Average of maximum precipitation ammount per day</p> <p>Individual values for all pixels based on Climate Atlas spatial layers</p> |

|                 |                                                                                                                                                               |
|-----------------|---------------------------------------------------------------------------------------------------------------------------------------------------------------|
| <b>06_MOIST</b> | <b>Moisture balance indicator</b>                                                                                                                             |
| Data source     | Slovak Hydrometeorological Institute – Climate Atlas of Slovakia                                                                                              |
| Data accuracy   | 1:50,000                                                                                                                                                      |
| Units           | Millimeters (annual)                                                                                                                                          |
| Min / Max *     | -1753 / 230                                                                                                                                                   |
| Legend          | <p>Average annual moisture balance (evapotranspiration minus precipitation)</p> <p>Individual values for all pixels based on Climate Atlas spatial layers</p> |

|               |                                                                                                                         |
|---------------|-------------------------------------------------------------------------------------------------------------------------|
| <b>07_RAD</b> | <b>Average annual amount of solar radiation</b>                                                                         |
| Data source   | Slovak Hydrometeorological Institute – Climate Atlas of Slovakia                                                        |
| Data accuracy | 1:50,000                                                                                                                |
| Units         | Wh.m <sup>-2</sup> (annual)                                                                                             |
| Min / Max *   | 3616 / 4342                                                                                                             |
| Legend        | <p>Average annual amount of radiation</p> <p>Individual values for all pixels based on Climate Atlas spatial layers</p> |

|                |                                                                                                                                                                                                                                                                                                                                                                                                                                                                                                                                                                                                                                                                                                                                                                                                                                                                                                                                                                                                                                                           |
|----------------|-----------------------------------------------------------------------------------------------------------------------------------------------------------------------------------------------------------------------------------------------------------------------------------------------------------------------------------------------------------------------------------------------------------------------------------------------------------------------------------------------------------------------------------------------------------------------------------------------------------------------------------------------------------------------------------------------------------------------------------------------------------------------------------------------------------------------------------------------------------------------------------------------------------------------------------------------------------------------------------------------------------------------------------------------------------|
| <b>08_CLIM</b> | <b>Classification of climate</b>                                                                                                                                                                                                                                                                                                                                                                                                                                                                                                                                                                                                                                                                                                                                                                                                                                                                                                                                                                                                                          |
| Data source    | Slovak Hydrometeorological Institute – Climate Atlas of Slovakia                                                                                                                                                                                                                                                                                                                                                                                                                                                                                                                                                                                                                                                                                                                                                                                                                                                                                                                                                                                          |
| Data accuracy  | 1:50,000                                                                                                                                                                                                                                                                                                                                                                                                                                                                                                                                                                                                                                                                                                                                                                                                                                                                                                                                                                                                                                                  |
| Units          | Qualitative categories                                                                                                                                                                                                                                                                                                                                                                                                                                                                                                                                                                                                                                                                                                                                                                                                                                                                                                                                                                                                                                    |
| Min / Max *    | 19 categories of climate types                                                                                                                                                                                                                                                                                                                                                                                                                                                                                                                                                                                                                                                                                                                                                                                                                                                                                                                                                                                                                            |
| Legend         | <p>Main types of climate:</p> <p>3 – moderately cool climate (C1)<br/> 4 – cold mountain climate (C2)<br/> 5 – very cold mountain climate (C3)<br/> 6 – warm, very dry, mild winter (T1)<br/> 7 – warm, dry, mild winter (T2)<br/> 8 – warm, dry, cool winter (T3)<br/> 9 – warm, moderately dry, mild winter (T4)<br/> 10 – warm, moderately dry, cool winter (T5)<br/> 11 – warm, moderately wet, mild winter (T6)<br/> 12 – warm, moderately wet, cool winter (T7)<br/> 13 – warm, wet, mild winter (T8)<br/> 14 – warm, wet, cool winter (T9)<br/> 15 – moderately warm, moderately wet, mild winter, uphill climate (M1)<br/> 16 – moderately warm, moderately wet, cool winter, valley climate (M2)<br/> 17 - moderately warm, moderately wet, uphill-mountain climate (M3)<br/> 18 - moderately warm, wet, mild climate, uphill-lowland climate (M4)<br/> 19 - moderately warm, wet, cool to cold winter, valley climate (M5)<br/> 20 - moderately warm, wet, mountain climate (M6)<br/> 21 - moderately warm, very wet, mountain climate (M7)</p> |

|                 |                                                                                                                                                                                                                                                                                                                                                                                                                                                                                                                                                                                                                                                              |
|-----------------|--------------------------------------------------------------------------------------------------------------------------------------------------------------------------------------------------------------------------------------------------------------------------------------------------------------------------------------------------------------------------------------------------------------------------------------------------------------------------------------------------------------------------------------------------------------------------------------------------------------------------------------------------------------|
| <b>09_BASIN</b> | <b>Hydrological basins (watersheds)</b>                                                                                                                                                                                                                                                                                                                                                                                                                                                                                                                                                                                                                      |
| Data source     | Water Management Map of Slovakia (Slovak Water Management Agency)                                                                                                                                                                                                                                                                                                                                                                                                                                                                                                                                                                                            |
| Data accuracy   | 1:50,000                                                                                                                                                                                                                                                                                                                                                                                                                                                                                                                                                                                                                                                     |
| Units           | Area – ha; other spatial indicators                                                                                                                                                                                                                                                                                                                                                                                                                                                                                                                                                                                                                          |
| Min / Max *     | --- (Individual elements)                                                                                                                                                                                                                                                                                                                                                                                                                                                                                                                                                                                                                                    |
| Legend          | <p>Individual regions, representing the main spatial units for the water flows and other hydrological and geomorphological processes (... units in Slovakia).</p> <p><i>Main information used for ES calculaton:</i></p> <ul style="list-style-type: none"> <li>- mean slope inclination (0.33 / 33.1 degrees)</li> <li>- dissection of the basin – ratio of „real surface area“ to the area of basin on the map (1.0 / 1.34)</li> </ul> <p><i>Other information for all river basins:</i></p> <ul style="list-style-type: none"> <li>- area, perimeter</li> <li>- min., max. and mean elevation</li> <li>- lenght and density of stream network.</li> </ul> |

|                                      |                                                                                                                  |
|--------------------------------------|------------------------------------------------------------------------------------------------------------------|
| <b>Map layer 10</b>                  | <b>Watercourses and water bodies</b>                                                                             |
| Data source                          | Water Management Map of Slovakia (Slovak Water Management Agency)                                                |
| Data accuracy                        | 1:50,000                                                                                                         |
| Units                                | 0, 1 (presence)                                                                                                  |
| Min / Max *                          | ---- (Individual elements)                                                                                       |
| Legend<br><b>Vodné nádrže a toky</b> | Individual features representing watercourses and water bodies (derived from the WM map), both with buffer 50 m. |

|                  |                                                                                                                                                              |
|------------------|--------------------------------------------------------------------------------------------------------------------------------------------------------------|
| <b>10_WATBOD</b> | <b>Drinking groundwater resources</b>                                                                                                                        |
| Data source      | Water Management Map of Slovakia (Slovak Water Management Agency)                                                                                            |
| Data accuracy    | 1:50,000                                                                                                                                                     |
| Units            | 0, 1 (presence)                                                                                                                                              |
| Min / Max *      | ---- (Individual elements)                                                                                                                                   |
| Legend           | Individual features representing used groundwater resources (wells, drills) derived from the WM map - both with buffer 100 m.<br>0 – absence<br>1 – presence |

|                   |                                                                                                                                                                    |
|-------------------|--------------------------------------------------------------------------------------------------------------------------------------------------------------------|
| <b>12_WATRES2</b> | <b>Drinking groundwater protection zones</b>                                                                                                                       |
| Data source       | Water Management Map of Slovakia (Slovak Water Management Agency)                                                                                                  |
| Data accuracy     | 1:50,000                                                                                                                                                           |
| Units             | Qualitative scale                                                                                                                                                  |
| Min / Max *       | 3 categories of protection                                                                                                                                         |
| Legend            | Individual features representing protection zones of groundwater resources:<br>0 – no protection zones<br>1 – outer protection zones<br>2 – inner protection zones |

|                  |                                                                                                                                                                     |
|------------------|---------------------------------------------------------------------------------------------------------------------------------------------------------------------|
| <b>13_DRINK1</b> | <b>Surface drinking water sources</b>                                                                                                                               |
| Data source      | Water Management Map of Slovakia (Slovak Water Management Agency)                                                                                                   |
| Data accuracy    | 1:50,000                                                                                                                                                            |
| Units            | 0, 1 (presence)                                                                                                                                                     |
| Min / Max *      | ---- (Individual elements)                                                                                                                                          |
| Legend           | Individual features representing used surface water resources (reservoirs, streams) derived from the WM map - both with buffer 50 m.<br>0 – absence<br>1 – presence |

|                  |                                                                                                                                                  |
|------------------|--------------------------------------------------------------------------------------------------------------------------------------------------|
| <b>14_DRINK2</b> | <b>Surface drinking water basins</b>                                                                                                             |
| Data source      | Water Management Map of Slovakia (Slovak Water Management Agency)                                                                                |
| Data accuracy    | 1:50,000                                                                                                                                         |
| Units            | 0, 1 (presence)                                                                                                                                  |
| Min / Max *      | ---- (Individual elements)                                                                                                                       |
| Legend           | Individual features representing basins of surface water resources (reservoirs, streams) derived from the WM map.<br>0 – absence<br>1 – presence |

|                 |                                                                                                                                                                                                  |
|-----------------|--------------------------------------------------------------------------------------------------------------------------------------------------------------------------------------------------|
| <b>15_MEDIC</b> | <b>Natural medicinal resources protection zones</b>                                                                                                                                              |
| Data source     | Water Management Map of Slovakia (Slovak Water Management Agency)                                                                                                                                |
| Data accuracy   | 1:50,000                                                                                                                                                                                         |
| Units           | Qualitative scale                                                                                                                                                                                |
| Min / Max *     | 3 categories of protection                                                                                                                                                                       |
| Legend          | Individual features representing protection zones of natural medicinal resources derived from the WM map.<br>0 – no protection zones<br>1 – outer protection zones<br>2 – inner protection zones |

|                   |                                                                                                                                                                     |
|-------------------|---------------------------------------------------------------------------------------------------------------------------------------------------------------------|
| <b>16_WATPROT</b> | <b>Protected water management areas</b>                                                                                                                             |
| Data source       | Water Management Map of Slovakia (Slovak Water Management Agency)                                                                                                   |
| Data accuracy     | 1:50,000                                                                                                                                                            |
| Units             | 0, 1 (presence)                                                                                                                                                     |
| Min / Max *       | ---- (Individual elements)                                                                                                                                          |
| Legend            | Individual features representing special category of water protection – large-scale water protection areas; derived from the WM map.<br>0 – absence<br>1 – presence |

|               |                                                                                                                 |
|---------------|-----------------------------------------------------------------------------------------------------------------|
|               | <b>Average groundwater depth</b>                                                                                |
| Data source   | Database of Institute of Landscape Ecology SAS                                                                  |
| Data accuracy | 1:25,000                                                                                                        |
| Units         | meters below surface                                                                                            |
| Min / Max *   | 0.0 / 626                                                                                                       |
| Legend        | Average depth of groundwater level<br>Derived from database of detailed landscape-ecological units of Slovakia. |

|                |                                                                                                                                                                                                                                                                                                                                                                                                                                                                                                                                                                                                                                                                                                                                                                                                                                                                                                                                                                                                                                                                                  |
|----------------|----------------------------------------------------------------------------------------------------------------------------------------------------------------------------------------------------------------------------------------------------------------------------------------------------------------------------------------------------------------------------------------------------------------------------------------------------------------------------------------------------------------------------------------------------------------------------------------------------------------------------------------------------------------------------------------------------------------------------------------------------------------------------------------------------------------------------------------------------------------------------------------------------------------------------------------------------------------------------------------------------------------------------------------------------------------------------------|
| <b>18_SSUB</b> | <b>Soil subtype</b>                                                                                                                                                                                                                                                                                                                                                                                                                                                                                                                                                                                                                                                                                                                                                                                                                                                                                                                                                                                                                                                              |
| Data source    | Database of Institute of Landscape Ecology SAS; Soil Research Institute; National Forestry Centre.                                                                                                                                                                                                                                                                                                                                                                                                                                                                                                                                                                                                                                                                                                                                                                                                                                                                                                                                                                               |
| Data accuracy  | 1:25,000                                                                                                                                                                                                                                                                                                                                                                                                                                                                                                                                                                                                                                                                                                                                                                                                                                                                                                                                                                                                                                                                         |
| Units          | Qualitative categories                                                                                                                                                                                                                                                                                                                                                                                                                                                                                                                                                                                                                                                                                                                                                                                                                                                                                                                                                                                                                                                           |
| Min / Max *    | 75 categories of soil spatial units – soil subtypes)                                                                                                                                                                                                                                                                                                                                                                                                                                                                                                                                                                                                                                                                                                                                                                                                                                                                                                                                                                                                                             |
| Legend         | Types of soil units (FAO classification: World Reference Base 1994):<br><ol style="list-style-type: none"> <li>1. Lithic Leptosols</li> <li>2. Regosols</li> <li>3. Psephytic Regosols</li> <li>4. Arenic Regosols</li> <li>5. Pelic Regosols</li> <li>6. Skeletic Leptosols</li> <li>7. Cambi- Leptosols</li> <li>8. Tephri- Leptosols</li> <li>9. Skeli- dystic Leptosols</li> <li>10. Rendzic Leptosols</li> <li>11. Rendzic Leptosols (skeletic)</li> <li>12. Rendzic Leptosols (cambic)</li> <li>13. Foli- rendzic Leptosols</li> <li>14. Skeli- rendzic Leptosols</li> <li>15. Chromi- rendzic Leptosols</li> <li>16. Calcaric Cambisols</li> <li>17. Calcaric Cambisols (skeletic)</li> <li>18. Stagni-Calcaric cambisols</li> <li>19. ---</li> <li>20. Haplic Vertisols</li> <li>21. Haplic Chernozems</li> <li>22. Arenic Chernozems</li> <li>23. Pelic Chernozems</li> <li>24. Luvi-Haplic Chernozems</li> <li>25. ---</li> <li>26. Haplic Chernozems II.</li> <li>27. Stagni-Haplic Chernozems</li> <li>28. Mollic Fluvisols</li> <li>29. Arenic Fluvisols</li> </ol> |

30. Pelic Fluvisols
31. Mollic Fluvisols II.
32. Mollic Gleysols
33. Histi- mollic Gleysols
34. ---
35. ---
36. ---
37. Haplic Luvisols
38. Arenic Luvisols
39. Albi-Haplic Luvisols
40. Stagni-Haplic Luvisols
41. Chromic Luvisols
42. Albic Luvisols
43. Arenic Luvisols
44. ---
45. Stagnic Glossisols
46. ---
47. Eutric Modal Cambisols
48. Psefitic Cambisols
49. Arenic Cambisols
50. Pelic Cambisols
51. Rendzic Cambisols
52. Eutric Cambisols
53. Dystric Cambisols
54. Cambi- Andosols
55. Luvi- Cambisols
56. Stagni- Cambisols
57. Chromic Cambisols
58. Eutric Andosols
59. Haplic Podzols
60. ---
61. Cambic Podzols
62. ---
63. Foli-Haplic Podzols
64. Dystric Stagnosols
65. Luvic Stagnosols
66. Haplic Stagnosols
67. Gleyic Stagnosols
68. ---
69. ---
70. Haplic Gleysols
71. Arenic Gleysols
72. Histi-Mollic Gleysols
73. Haplic Histosols
74. ---
75. Fibric Histosols
76. Eutric Fluvisols
77. Psefitic Fluvisols
78. Arenic Fluvisols
79. Pelic Fluvisols
80. Gleyic Fluvisols
81. ---
82. ---
83. ---
84. Haplic Solonetz
85. ---
86. Hortic Anthrosols

|  |                                                                                                                     |
|--|---------------------------------------------------------------------------------------------------------------------|
|  | 87. Degraded Anthrosols<br>88. Urbi-Anthropoc Regosols<br>89. Degraded Anthropoc Regosols<br>90. Water<br>91. Rocks |
|--|---------------------------------------------------------------------------------------------------------------------|

| <b>19_STEX</b> | <b>Soil texture</b>                                                                                                                                                                                                                                                                                                                                          |
|----------------|--------------------------------------------------------------------------------------------------------------------------------------------------------------------------------------------------------------------------------------------------------------------------------------------------------------------------------------------------------------|
| Data source    | Database of Institute of Landscape Ecology SAS; Soil Research Institute; National Forestry Centre.                                                                                                                                                                                                                                                           |
| Data accuracy  | 1:25,000                                                                                                                                                                                                                                                                                                                                                     |
| Units          | Qualitative categories                                                                                                                                                                                                                                                                                                                                       |
| Min / Max *    | 12 categories of soil texture                                                                                                                                                                                                                                                                                                                                |
| Legend         | Types of soil texture (USDA classification): <ol style="list-style-type: none"> <li>1. sand</li> <li>2. loamy sand</li> <li>3. sandy loam</li> <li>4. loam</li> <li>5. silt loam</li> <li>6. silt</li> <li>7. sandy clay loam</li> <li>8. clay loam</li> <li>9. silty clay loam</li> <li>10. sandy clay</li> <li>11. silty clay</li> <li>12. clay</li> </ol> |

| <b>20_SDEP</b> | <b>Soil depth</b>                                                                                  |
|----------------|----------------------------------------------------------------------------------------------------|
| Data source    | Database of Institute of Landscape Ecology SAS; Soil Research Institute; National Forestry Centre. |
| Data accuracy  | 1:25,000                                                                                           |
| Units          | centimeters                                                                                        |
| Min / Max *    | 0.0 / 112                                                                                          |
| Legend         | Average soil depth<br>Derived from database of detailed landscape-ecological units of Slovakia.    |

| <b>21_LAND</b> | <b>Current landscape structure / land use</b>                                                                                                                                                                                                                                                                                                                                                                                                                                     |
|----------------|-----------------------------------------------------------------------------------------------------------------------------------------------------------------------------------------------------------------------------------------------------------------------------------------------------------------------------------------------------------------------------------------------------------------------------------------------------------------------------------|
| Data source    | Spatial information system ZB GIS, Open Street Map                                                                                                                                                                                                                                                                                                                                                                                                                                |
| Data accuracy  | 1:25,000                                                                                                                                                                                                                                                                                                                                                                                                                                                                          |
| Units          | Qualitative categories                                                                                                                                                                                                                                                                                                                                                                                                                                                            |
| Min / Max *    | 16 categories of land use (landscape structure)                                                                                                                                                                                                                                                                                                                                                                                                                                   |
| Legend         | Basic types of land use: <ol style="list-style-type: none"> <li>1. urban residential area</li> <li>2. urban fabric – industrial, commercial and transport areas</li> <li>3. mines and quarries, dump sites, areas under construction</li> <li>4. urban green areas, sport and leisure areas</li> <li>5. arable land</li> <li>6. vineyards, orchards and gardens</li> <li>7. grasslands (meadows and pastures)</li> <li>9. deciduous forests</li> <li>10. mixed forests</li> </ol> |



|  |                                                                                                                                                                                                                                                              |
|--|--------------------------------------------------------------------------------------------------------------------------------------------------------------------------------------------------------------------------------------------------------------|
|  | 11. coniferous forests<br>15. areas with scattered vegetation, landscape mosaics<br>16. rocks and screes<br>17. wetlands, peatbogs<br>18. watercourses and water bodies<br>19. woodlands in agricultural areas<br>20. non-specified forests (military areas) |
|--|--------------------------------------------------------------------------------------------------------------------------------------------------------------------------------------------------------------------------------------------------------------|

|                 |                                                                                                           |
|-----------------|-----------------------------------------------------------------------------------------------------------|
| <b>22_DIVER</b> | <b>Spatial diversity of landscape structure</b>                                                           |
| Data source     | Database of Constantine the Philosopher University                                                        |
| Data accuracy   | 1:25,000                                                                                                  |
| Units           | land use types per km <sup>2</sup>                                                                        |
| Min / Max *     | 1 / 13                                                                                                    |
| Legend          | Spatial diversity is expressed as a number of different land use types in the area of 1 km <sup>2</sup> . |

|                |                                                                                                                                                                                                                                                                                                                                                                                                                                                                                                                                                                                                                                                                                                                                                                                                                                                                                                                                                                                                                                                                                                                                                                                                                                                                                                                                                                                                                                                      |
|----------------|------------------------------------------------------------------------------------------------------------------------------------------------------------------------------------------------------------------------------------------------------------------------------------------------------------------------------------------------------------------------------------------------------------------------------------------------------------------------------------------------------------------------------------------------------------------------------------------------------------------------------------------------------------------------------------------------------------------------------------------------------------------------------------------------------------------------------------------------------------------------------------------------------------------------------------------------------------------------------------------------------------------------------------------------------------------------------------------------------------------------------------------------------------------------------------------------------------------------------------------------------------------------------------------------------------------------------------------------------------------------------------------------------------------------------------------------------|
| <b>23_FOR1</b> | <b>Classification of forests</b>                                                                                                                                                                                                                                                                                                                                                                                                                                                                                                                                                                                                                                                                                                                                                                                                                                                                                                                                                                                                                                                                                                                                                                                                                                                                                                                                                                                                                     |
| Data source    | National Forest Centre, State Nature Conservancy of Slovak Republic                                                                                                                                                                                                                                                                                                                                                                                                                                                                                                                                                                                                                                                                                                                                                                                                                                                                                                                                                                                                                                                                                                                                                                                                                                                                                                                                                                                  |
| Data accuracy  | 1:25,000                                                                                                                                                                                                                                                                                                                                                                                                                                                                                                                                                                                                                                                                                                                                                                                                                                                                                                                                                                                                                                                                                                                                                                                                                                                                                                                                                                                                                                             |
| Units          | Qualitative categories                                                                                                                                                                                                                                                                                                                                                                                                                                                                                                                                                                                                                                                                                                                                                                                                                                                                                                                                                                                                                                                                                                                                                                                                                                                                                                                                                                                                                               |
| Min / Max *    | 56 categories of forests                                                                                                                                                                                                                                                                                                                                                                                                                                                                                                                                                                                                                                                                                                                                                                                                                                                                                                                                                                                                                                                                                                                                                                                                                                                                                                                                                                                                                             |
| Legend         | Forest types (based on real tree composition of forest spatial areas)<br>1 – <i>Robinia</i> forests<br>2 – <i>Pinus-Picea</i> forests<br>3 – <i>Pinus</i> forests<br>4 - <i>Pinus</i> forests, small proportion of other conifers<br>5 - <i>Pinus</i> forests, small proportion of deciduous trees<br>6 – <i>Betula</i> forests<br>7 - <i>Betula</i> forests, small proportion of conifers<br>8 - <i>Betula</i> forests, small proportion of other deciduous trees<br>9 – <i>Fagus-Oak</i> forests<br>10 – <i>Fagus-Carpinus</i> forests<br>11 – <i>Fagus-Abies-Picea</i> forests<br>12 – <i>Fagus-Picea</i> forests<br>13 – <i>Fagus</i> forests<br>14 – <i>Fagus</i> forests, small proportion of conifers<br>15 – <i>Fagus</i> forests, small proportion of other deciduous trees<br>16 – <i>Q. Cerris-Quercus</i> forests<br>17 – <i>Q. Cerris-Carpinus</i> forests<br>18 – <i>Q. Cerris</i> forests<br>19 – <i>Quercus-Fagus-Carpinus</i> forests<br>20 – <i>Quercus-Fagus-Abies</i> forests<br>21 – <i>Quercus-Fagus</i> forests<br>22 – <i>Quercus-Cerris-Carpinus</i> forests<br>23 – <i>Quercus-Cerris</i> forests<br>24 – <i>Quercus-Carpinus</i> forests<br>25 – <i>Quercus</i> forests<br>26 – <i>Quercus</i> forests, small proportion of conifers<br>27 – <i>Carpinus-Fagus</i> forests<br>28 – <i>Carpinus-Cerris</i> forests<br>29 – <i>Carpinus-Quercus</i> forests<br>30 – <i>Carpinus</i> forests<br>31 – Other deciduous forests |

|  |                                                                                                                                                                                                                                                                                                                                                                                                                                                                                                                                                                                                                                                                                                                                                                                                                                                                                                                                                                                                                                                                                                              |
|--|--------------------------------------------------------------------------------------------------------------------------------------------------------------------------------------------------------------------------------------------------------------------------------------------------------------------------------------------------------------------------------------------------------------------------------------------------------------------------------------------------------------------------------------------------------------------------------------------------------------------------------------------------------------------------------------------------------------------------------------------------------------------------------------------------------------------------------------------------------------------------------------------------------------------------------------------------------------------------------------------------------------------------------------------------------------------------------------------------------------|
|  | 32 – <i>Sorbus auc.</i> forests<br>33 – <i>Abies-Fagus</i> forests<br>34 – <i>Abies-Picea</i> forests<br>35 – <i>Abies</i> forests<br>36 – <i>Abies</i> forests, small proportion of other conifers<br>37 - <i>Abies</i> forests, small proportion of deciduous trees<br>38 – <i>Alnus</i> forests<br>39 - <i>Dwarf Pine</i> forests<br>40 – <i>Dwarf Pine</i> forests, small proportion of other conifers<br>41 - <i>Dwarf Pine</i> forests, small proportion of deciduous trees<br>42 – <i>Pinus strobus</i> forests<br>43 – Forests with occurrence of <i>Pinus strobus</i><br>44 – <i>Populus-Salix</i> forests<br>45 – Initial stage of forests<br>46 – <i>Larix-Picea</i> forests<br>47 – <i>Larix</i> forests<br>48 – <i>Larix</i> forests, small proportion of other conifers<br>49 – <i>Larix</i> forests, small proportion of deciduous trees<br>50 – <i>Picea-Fagus-Abies</i> forests<br>51 – <i>Picea-Fagus</i> forests<br>52 – <i>Picea- Abies</i> forests<br>53 – <i>Picea</i> forests<br>54 – <i>Populus</i> forests<br>55 – <i>Fraxinus-Ulmus</i> forests<br>56 – Mixed <i>Picea</i> forests |
|--|--------------------------------------------------------------------------------------------------------------------------------------------------------------------------------------------------------------------------------------------------------------------------------------------------------------------------------------------------------------------------------------------------------------------------------------------------------------------------------------------------------------------------------------------------------------------------------------------------------------------------------------------------------------------------------------------------------------------------------------------------------------------------------------------------------------------------------------------------------------------------------------------------------------------------------------------------------------------------------------------------------------------------------------------------------------------------------------------------------------|

|                |                                                                                                                                                                                                                                                                                                                                                                                                                                                                                                                                                                                                                                                                                                                                                        |
|----------------|--------------------------------------------------------------------------------------------------------------------------------------------------------------------------------------------------------------------------------------------------------------------------------------------------------------------------------------------------------------------------------------------------------------------------------------------------------------------------------------------------------------------------------------------------------------------------------------------------------------------------------------------------------------------------------------------------------------------------------------------------------|
| <b>24_FOR2</b> | <b>Forest functional categories</b>                                                                                                                                                                                                                                                                                                                                                                                                                                                                                                                                                                                                                                                                                                                    |
| Data source    | National Forest Centre, State Nature Conservancy of Slovak Republic                                                                                                                                                                                                                                                                                                                                                                                                                                                                                                                                                                                                                                                                                    |
| Data accuracy  | 1:25,000                                                                                                                                                                                                                                                                                                                                                                                                                                                                                                                                                                                                                                                                                                                                               |
| Units          | Qualitative categories                                                                                                                                                                                                                                                                                                                                                                                                                                                                                                                                                                                                                                                                                                                                 |
| Min / Max *    | 13 categories of forest functional classes                                                                                                                                                                                                                                                                                                                                                                                                                                                                                                                                                                                                                                                                                                             |
| Legend         | 0 –Forests with dominant production function<br>1 – Protection forests: Forests on extreme sensitive areas<br>2 - Protection forests: High-mountain forests<br>3 - Protection forests: Dwarf-pine forests above tree-line<br>4 - Protection forests: Forests with erosion-protection function<br>5 – Special forests: Water protection forests<br>6 – Special forests: Natural healing resources protection forests<br>7 – Special forests: Urban forests and recreational forests<br>8 – Special forests: Forests in game reserves<br>9 – Special forests: Forests in nature protection areas<br>10 – Special forests: Gene-pool forests<br>11 – Special forests: Research and educational forests<br>12 – Special forests: Forests in military areas |

|                  |                                                                                    |
|------------------|------------------------------------------------------------------------------------|
| <b>25_FORAGE</b> | <b>Forest age</b>                                                                  |
| Data source      | National Forest Centre, State Nature Conservancy of Slovak Republic                |
| Data accuracy    | 1:25,000                                                                           |
| Units            | Years                                                                              |
| Min / Max *      | 0 / 225                                                                            |
| Legend           | Age of forest spatial units<br>Derived from information database of Slovak forests |

|                  |                                                                                                                                                                                                                                                                                                                                                                                                                                                                                                                                                                                                                                                                                                                                                                                                                                                                                                                                                                                                                                                                                                                                                                                                                                                                                                                                                                                                                                                                                                                                                                                                                                                                                                                                                                                                                                                                                                                                                                                                                                                                                                                                                                                                                                                                                                                                                                                                                                                                                                                                                                                                                                                                                                                                                                                                                                                                                                                                                                                                                                                                                                                                                                                                                                                                                                                                                                                          |
|------------------|------------------------------------------------------------------------------------------------------------------------------------------------------------------------------------------------------------------------------------------------------------------------------------------------------------------------------------------------------------------------------------------------------------------------------------------------------------------------------------------------------------------------------------------------------------------------------------------------------------------------------------------------------------------------------------------------------------------------------------------------------------------------------------------------------------------------------------------------------------------------------------------------------------------------------------------------------------------------------------------------------------------------------------------------------------------------------------------------------------------------------------------------------------------------------------------------------------------------------------------------------------------------------------------------------------------------------------------------------------------------------------------------------------------------------------------------------------------------------------------------------------------------------------------------------------------------------------------------------------------------------------------------------------------------------------------------------------------------------------------------------------------------------------------------------------------------------------------------------------------------------------------------------------------------------------------------------------------------------------------------------------------------------------------------------------------------------------------------------------------------------------------------------------------------------------------------------------------------------------------------------------------------------------------------------------------------------------------------------------------------------------------------------------------------------------------------------------------------------------------------------------------------------------------------------------------------------------------------------------------------------------------------------------------------------------------------------------------------------------------------------------------------------------------------------------------------------------------------------------------------------------------------------------------------------------------------------------------------------------------------------------------------------------------------------------------------------------------------------------------------------------------------------------------------------------------------------------------------------------------------------------------------------------------------------------------------------------------------------------------------------------------|
| <b>26_ECOSYS</b> | <b>Significant ecosystems (habitats)</b>                                                                                                                                                                                                                                                                                                                                                                                                                                                                                                                                                                                                                                                                                                                                                                                                                                                                                                                                                                                                                                                                                                                                                                                                                                                                                                                                                                                                                                                                                                                                                                                                                                                                                                                                                                                                                                                                                                                                                                                                                                                                                                                                                                                                                                                                                                                                                                                                                                                                                                                                                                                                                                                                                                                                                                                                                                                                                                                                                                                                                                                                                                                                                                                                                                                                                                                                                 |
| Data source      | State Nature Conservancy of Slovak Republic                                                                                                                                                                                                                                                                                                                                                                                                                                                                                                                                                                                                                                                                                                                                                                                                                                                                                                                                                                                                                                                                                                                                                                                                                                                                                                                                                                                                                                                                                                                                                                                                                                                                                                                                                                                                                                                                                                                                                                                                                                                                                                                                                                                                                                                                                                                                                                                                                                                                                                                                                                                                                                                                                                                                                                                                                                                                                                                                                                                                                                                                                                                                                                                                                                                                                                                                              |
| Data accuracy    | 1:25,000                                                                                                                                                                                                                                                                                                                                                                                                                                                                                                                                                                                                                                                                                                                                                                                                                                                                                                                                                                                                                                                                                                                                                                                                                                                                                                                                                                                                                                                                                                                                                                                                                                                                                                                                                                                                                                                                                                                                                                                                                                                                                                                                                                                                                                                                                                                                                                                                                                                                                                                                                                                                                                                                                                                                                                                                                                                                                                                                                                                                                                                                                                                                                                                                                                                                                                                                                                                 |
| Units            | Qualitative categories                                                                                                                                                                                                                                                                                                                                                                                                                                                                                                                                                                                                                                                                                                                                                                                                                                                                                                                                                                                                                                                                                                                                                                                                                                                                                                                                                                                                                                                                                                                                                                                                                                                                                                                                                                                                                                                                                                                                                                                                                                                                                                                                                                                                                                                                                                                                                                                                                                                                                                                                                                                                                                                                                                                                                                                                                                                                                                                                                                                                                                                                                                                                                                                                                                                                                                                                                                   |
| Min / Max *      | 62 categories of ecosystem types                                                                                                                                                                                                                                                                                                                                                                                                                                                                                                                                                                                                                                                                                                                                                                                                                                                                                                                                                                                                                                                                                                                                                                                                                                                                                                                                                                                                                                                                                                                                                                                                                                                                                                                                                                                                                                                                                                                                                                                                                                                                                                                                                                                                                                                                                                                                                                                                                                                                                                                                                                                                                                                                                                                                                                                                                                                                                                                                                                                                                                                                                                                                                                                                                                                                                                                                                         |
| Legend           | <p>Selected ecosystems (or EUNIS habitats) – based on ecosystem map Černecký et al. 2019:</p> <ol style="list-style-type: none"> <li>1 Riparian woodland, with dominant poplar and willow (G1.111)</li> <li>3 Landscape mosaic with unspecified woods and grasslands</li> <li>4 Agricultural areas with high share of natural vegetation</li> <li>6 Water bodies - unspecified</li> <li>7 Managed grasslands - unspecified</li> <li>8 Watercourses - unspecified</li> <li>10 Wetlands - unspecified</li> <li>13 Orchards - unspecified</li> <li>16 Urban green areas, parks - unspecified</li> <li>19 Alpine and sub-mediterranean chasmophyte communities (EUNIS H3.25)</li> <li>21 Beech and fire forests (EUNIS G1.23)</li> <li>23 Acid siliceous inland cliffs (EUNIS H3.11)</li> <li>25 Meso- and eutrophic Oak-Hornbeam forests with lime (EUNIS G1.A16)</li> <li>26 Medio-European ravine forests (EUNIS G1.A41)</li> <li>27 Other grasslands - unspecified</li> <li>28 Subcontinental riverine meadows - <i>Cnidion venosi</i> (EUNIS E3.43)</li> <li>29 Mixed oak - elm - ash woodland of great rivers (EUNIS G1.22)</li> <li>30 Orchards - unspecified</li> <li>32 [<i>Festuca pallens</i>] grassland (EUNIS E1.291)</li> <li>33 Eastern [<i>Quercus pubescens</i>] woods (EUNIS G1.7374)</li> <li>34 Sub-Atlantic lowland hay meadows (EUNIS E2.22)</li> <li>35 Riverine [<i>Fraxinus</i>] - [<i>Alnus</i>] woodland, wet at high but not at low water (EUNIS G1.21)</li> <li>36 Euro-Siberian rock debris swards - <i>Alyso-Sedion albi</i> (EUNIS E1.11)</li> <li>37 Arid subcontinental steppic grassland ([<i>Festucion valesiaca</i>]) (EUNIS E1.2211), [<i>Festuca pallens</i>] grassland (E1.2932)</li> <li>38 Steppe [<i>Quercus</i>] woods (EUNIS G1.7A1)</li> <li>39 Meso-xerophile subcontinental meadow-steppes ([<i>Cirsio-Brachypodion</i>]) with <i>Orchidaceae</i> (EUNIS E1.231)</li> <li>40 Perennial calcareous grassland and basic steppes (EUNIS E2.1)</li> <li>41 Orogenous riverine brush (with <i>Salix elaeagnos</i>) (EUNIS F9.111)</li> <li>42 Weathered rock and outcrop habitats – pioneer vegetation (EUNIS H3.62)</li> <li>43 Balkano-Anatolian thermophilous [<i>Quercus</i>] forests – <i>Q. cerris</i> (EUNIS G1.76)</li> <li>44 Atlantic and sub-Atlantic humid meadows (EUNIS E3.41)</li> <li>45 Scree – biotopes with sparse vegetation (EUNIS H2)</li> <li>46 Medio-European acidophilous [<i>Quercus</i>] forests (EUNIS G1.87)</li> <li>47 Calcareous and ultra-basic scree of warm exposures (EUNIS H2.61)</li> <li>48 Temperate-montane acid siliceous scree – secondary biotopes (EUNIS H2.32)</li> <li>49 Medio-European acidophilous [<i>Fagus</i>] forests (EUNIS G1.61)</li> <li>50 Medio-European subalpine [<i>Fagus</i>] woods (EUNIS G1.65)</li> <li>51 [<i>Abies</i>] and [<i>Picea</i>] woodland (EUNIS G3.1)</li> <li>52 Temperate-montane calcareous and ultra-basic scree (EUNIS H2.44)</li> <li>53 Medio-European limestone [<i>Fagus</i>] forests (EUNIS G1.66)</li> <li>54 Dry heaths (EUNIS F4.2), Alpigenic high mountain [<i>Empetrum - Vaccinium</i>] heaths (EUNIS F2.24)</li> <li>56 [<i>Molinia caerulea</i>] meadows and related communities (EUNIS E3.51)</li> <li>59 Sparsely vegetated river gravel banks (EUNIS C3.55221)</li> <li>60 Inland cliffs, rock pavements and outcrops (EUNIS H3)</li> </ol> |

|  |                                                                                                                                                                                                                                                                                                                                                                                                                                                                                                                                                                                                                                                                                                                                                                                                                                                                                                                                                                                                                                                                                                                                                                                                                                 |
|--|---------------------------------------------------------------------------------------------------------------------------------------------------------------------------------------------------------------------------------------------------------------------------------------------------------------------------------------------------------------------------------------------------------------------------------------------------------------------------------------------------------------------------------------------------------------------------------------------------------------------------------------------------------------------------------------------------------------------------------------------------------------------------------------------------------------------------------------------------------------------------------------------------------------------------------------------------------------------------------------------------------------------------------------------------------------------------------------------------------------------------------------------------------------------------------------------------------------------------------|
|  | <p>61 Valley mires, poor fens and transition mires (EUNIS D2)</p> <p>62 Subalpine moist or wet tall-herb and fern stands (EUNIS E5.5)</p> <p>63 Alpine and Carpathian subalpine [Picea] forests (EUNIS G3.1B)</p> <p>64 [Phalaris arundinacea] beds (EUNIS C3.26), Beds of large [Carex] spp. (D5.21)</p> <p>65 Alpic [Nardus stricta] swards and related communities (EUNIS E4.3171), E1.712)</p> <p>66 Alpic mountain hay meadows (EUNIS E2.31), Subalpine [Trisetum flavescens] hay meadows (E4.51)</p> <p>75 Broadleaved swamp woodland not on acid peat (EUNIS G1.4)</p> <p>84 Atlantic [Quercus robur] - [Betula] woods (EUNIS G1.81)</p> <p>85 Middle European [Pinus sylvestris] forests (EUNIS G3.42)</p> <p>87 Spring heath [Pinus sylvestris] forests (EUNIS G3.442)</p> <p>88 Other forested and wooded areas – unspecified</p> <p>89 Boreo-alpine riparian galleries – Alnus (EUNIS G1.121)</p> <p>90 Sphagnum [Betula] woods (EUNIS G1.51)</p> <p>91 Nemoral bog conifer woodland (EUNIS G3.E)</p> <p>92 Inner range montane [Picea] forests (EUNIS G3.1C)</p> <p>93 Carpathian [Larix] and [Pinus cembra] forests (EUNIS G3.25)</p> <p>94 Inland cliffs, rock pavements and outcrops, unspecified (EUNIS H3)</p> |
|--|---------------------------------------------------------------------------------------------------------------------------------------------------------------------------------------------------------------------------------------------------------------------------------------------------------------------------------------------------------------------------------------------------------------------------------------------------------------------------------------------------------------------------------------------------------------------------------------------------------------------------------------------------------------------------------------------------------------------------------------------------------------------------------------------------------------------------------------------------------------------------------------------------------------------------------------------------------------------------------------------------------------------------------------------------------------------------------------------------------------------------------------------------------------------------------------------------------------------------------|

|                 |                                                                                                                                                                                                                                                                                                                                                                                                                                                                                                                                                                                                                                                                                                                                                                                                                  |
|-----------------|------------------------------------------------------------------------------------------------------------------------------------------------------------------------------------------------------------------------------------------------------------------------------------------------------------------------------------------------------------------------------------------------------------------------------------------------------------------------------------------------------------------------------------------------------------------------------------------------------------------------------------------------------------------------------------------------------------------------------------------------------------------------------------------------------------------|
| <b>27_NATUR</b> | <b>The naturalness of ecosystems</b>                                                                                                                                                                                                                                                                                                                                                                                                                                                                                                                                                                                                                                                                                                                                                                             |
| Data source     | UKF                                                                                                                                                                                                                                                                                                                                                                                                                                                                                                                                                                                                                                                                                                                                                                                                              |
| Data accuracy   | 1:25,000                                                                                                                                                                                                                                                                                                                                                                                                                                                                                                                                                                                                                                                                                                                                                                                                         |
| Units           | Qualitative categories                                                                                                                                                                                                                                                                                                                                                                                                                                                                                                                                                                                                                                                                                                                                                                                           |
| Min / Max *     | 12 categories of ecosystem naturalness                                                                                                                                                                                                                                                                                                                                                                                                                                                                                                                                                                                                                                                                                                                                                                           |
| Legend          | <p><i>Categories of naturalness (from artificial to natural), based on comparison of natural vegetation and current landscape structure:</i></p> <p>0 – anthropogenic areas without or very small proportion of vegetation</p> <p>1 – residential areas with gardens</p> <p>2 – residential green areas</p> <p>3 – agricultural areas, without permanent vegetation</p> <p>4 - agricultural areas, with permanent vegetation (grasslands, orchards, vineyards)</p> <p>5 – semi-natural grasslands, rocks and screes</p> <p>6 – plantations of non-domestic forests</p> <p>7 – forests with non-domestic tree species</p> <p>8 – forests with unspecified tree species composition</p> <p>9 – semi-natural forests</p> <p>10 – natural forests</p> <p>11 – watercourses and water bodies</p> <p>12 - wetlands</p> |

|                 |                                                                                                                                                                                                                        |
|-----------------|------------------------------------------------------------------------------------------------------------------------------------------------------------------------------------------------------------------------|
| <b>28_STATE</b> | <b>State of ecosystems</b>                                                                                                                                                                                             |
| Data source     | State Nature Conservancy of Slovak Republic                                                                                                                                                                            |
| Data accuracy   | 1:25,000                                                                                                                                                                                                               |
| Units           | Qualitative categories                                                                                                                                                                                                 |
| Min / Max *     | 4 categories of ecosystem status                                                                                                                                                                                       |
| Legend          | <p>Ecosystem status (according to IUCN)</p> <p>1 – ecosystems significantly changed by human activities</p> <p>2 – favourable state</p> <p>3 – unfavourable – inadequate state</p> <p>4 – unfavourable – bad state</p> |

|                 |                                                                                                                                                                                                                                                                                                                                                                                                                                                                                                                                                                                                                                                                                                                                  |
|-----------------|----------------------------------------------------------------------------------------------------------------------------------------------------------------------------------------------------------------------------------------------------------------------------------------------------------------------------------------------------------------------------------------------------------------------------------------------------------------------------------------------------------------------------------------------------------------------------------------------------------------------------------------------------------------------------------------------------------------------------------|
| <b>29_NATPR</b> | <b>Categorization of protected areas</b>                                                                                                                                                                                                                                                                                                                                                                                                                                                                                                                                                                                                                                                                                         |
| Data source     | State Nature Conservancy of Slovak Republic, European Environmental Agency                                                                                                                                                                                                                                                                                                                                                                                                                                                                                                                                                                                                                                                       |
| Data accuracy   | 1:25,000                                                                                                                                                                                                                                                                                                                                                                                                                                                                                                                                                                                                                                                                                                                         |
| Units           | Qualitative categories                                                                                                                                                                                                                                                                                                                                                                                                                                                                                                                                                                                                                                                                                                           |
| Min / Max *     | ----- Categories of nature and landscape protection                                                                                                                                                                                                                                                                                                                                                                                                                                                                                                                                                                                                                                                                              |
| Legend          | <p>Categories of nature and landscape protection:</p> <p><i>National system of nature protected areas – 5 degrees of protection:</i></p> <p>1 – basic landscape protection</p> <p>2 – large scale protection, mostly Landscape protected areas</p> <p>3 – large scale strickt protection, mostly National parks</p> <p>4 – strickt nature protection, mostly small-scale protected areas</p> <p>5 – very strickt protection (non-intervention areas)</p> <p><i>NATURA 2000 sites:</i></p> <p>11 – Habitats Directive Sites</p> <p>12 – Birds Directive Sites</p> <p><i>Other important natural areas:</i></p> <p>21 –Biosphere Reserves M&amp;B</p> <p>22 – UNESCO Natural Heritage sites</p> <p>23 – RAMSAR wetlands sites.</p> |

|                  |                                                                                                                                                                                                                                                                                                                                                                                                                                                                                                                                                                                                                                             |
|------------------|---------------------------------------------------------------------------------------------------------------------------------------------------------------------------------------------------------------------------------------------------------------------------------------------------------------------------------------------------------------------------------------------------------------------------------------------------------------------------------------------------------------------------------------------------------------------------------------------------------------------------------------------|
| <b>30_SIGNIF</b> | <b>Natural conservation significance of a territory</b>                                                                                                                                                                                                                                                                                                                                                                                                                                                                                                                                                                                     |
| Data source      | Constantine the Philosopher University in Nitra, State Nature Conservancy of Slovak Republic                                                                                                                                                                                                                                                                                                                                                                                                                                                                                                                                                |
| Data accuracy    | 1:25,000                                                                                                                                                                                                                                                                                                                                                                                                                                                                                                                                                                                                                                    |
| Units            | Qualitative categories                                                                                                                                                                                                                                                                                                                                                                                                                                                                                                                                                                                                                      |
| Min / Max *      | 5 categories of nature conservation significance (1 – 5)                                                                                                                                                                                                                                                                                                                                                                                                                                                                                                                                                                                    |
| Legend           | <p>Nature conservation significance of an area, based on combination of different categories of nature protection areas (NPA):</p> <p>1 – least significant areas (no special protection)</p> <p>2 – areas with occurence of 1-2 NPA (based on importance of nature protection)</p> <p>3 – areas with occurence of 2-3 NPA (based on importance of nature protection)</p> <p>4 - areas with occurence of 3 NPA (more important categories of nature protection), or within the 5th degree of nature protection</p> <p>5 – areas with overlap of at least 3 categories of nature protection, within the 5th degree of nature protection.</p> |

|                |                                                                                                                                                                            |
|----------------|----------------------------------------------------------------------------------------------------------------------------------------------------------------------------|
| <b>31_LEAF</b> | <b>Leaf area index (LAI)</b>                                                                                                                                               |
| Data source    | Copernicus Global Land Survey                                                                                                                                              |
| Data accuracy  | 1:50,000                                                                                                                                                                   |
| Units          | Coefficient                                                                                                                                                                |
| Min / Max *    | 0.018 / 6.592                                                                                                                                                              |
| Legend         | Leaf area index - one-sided green leaf area per unit ground surface area in broadleaf canopies. Expressed in $m^2/m^2$ (leaf area / ground area), usually between 0 and 7. |

|                 |                                                                                                                                                 |
|-----------------|-------------------------------------------------------------------------------------------------------------------------------------------------|
| <b>32_FAPAR</b> | <b>Photosynthetically active radiation (FAPAR)</b>                                                                                              |
| Data source     | Copernicus Global Land Survey                                                                                                                   |
| Data accuracy   | 1:50,000                                                                                                                                        |
| Units           | Coefficient                                                                                                                                     |
| Min / Max *     | 0.035 / 0.914                                                                                                                                   |
| Legend          | Fraction of Absorbed Photosynthetically Active Radiation - the light absorption across an integrated plant canopy (dimensionless, from 0 to 1). |

|                |                                                                                                                                                                                   |
|----------------|-----------------------------------------------------------------------------------------------------------------------------------------------------------------------------------|
| <b>33_NDVI</b> | <b>Normalized difference vegetation index (NDVI)</b>                                                                                                                              |
| Data source    | Copernicus Global Land Survey                                                                                                                                                     |
| Data accuracy  | 1:50,000                                                                                                                                                                          |
| Units          | Coefficient                                                                                                                                                                       |
| Min / Max *    | -0.03 / 0.92                                                                                                                                                                      |
| Legend         | Normalised difference vegetation index – indice based on spectral reflectance measurements acquired in the red (visible) and near-infrared bands.<br>Dimensionless, from -1 to 1. |

|                 |                                                                                                                                                                                     |
|-----------------|-------------------------------------------------------------------------------------------------------------------------------------------------------------------------------------|
| <b>34_THERM</b> | <b>Landscape potential for geothermal energy</b>                                                                                                                                    |
| Data source     | Landscape Atlas of the Slovak Republic                                                                                                                                              |
| Data accuracy   | 1:100,000+                                                                                                                                                                          |
| Units           | Qualitative categories                                                                                                                                                              |
| Min / Max *     | 4 categories of ecosystem status                                                                                                                                                    |
| Legend          | Potential for geothermal energy – thermal energy of the geothermal waters:<br>0 – very low (no relevant potential)<br>1 – low (to 50 ...)<br>2 – middle (50-250)<br>3 – high (250+) |

|                |                                                                                                                                                                                                                                |
|----------------|--------------------------------------------------------------------------------------------------------------------------------------------------------------------------------------------------------------------------------|
| <b>35_HUNT</b> | <b>Fishing and hunting areas</b>                                                                                                                                                                                               |
| Data source    | Landscape Atlas of the Slovak Republic                                                                                                                                                                                         |
| Data accuracy  | 1:100,000+                                                                                                                                                                                                                     |
| Units          | Qualitative categories                                                                                                                                                                                                         |
| Min / Max *    | Categories of significance of an area for fishing and hunting                                                                                                                                                                  |
| Legend         | Areas significant to the fishing and hunting:<br><i>Fishing areas</i> (yes / no)<br>0 - absence<br>2 - presence<br><i>Hunting areas</i> (importance):<br>1 - low importance<br>2 - high importance<br>3 - very high importance |

|                |                                                                                                                                                                                                                                                                                                                                                                                               |
|----------------|-----------------------------------------------------------------------------------------------------------------------------------------------------------------------------------------------------------------------------------------------------------------------------------------------------------------------------------------------------------------------------------------------|
| <b>36_HIST</b> | <b>Areas of traditional (historical) land use</b>                                                                                                                                                                                                                                                                                                                                             |
| Data source    | Landscape Atlas of the Slovak Republic                                                                                                                                                                                                                                                                                                                                                        |
| Data accuracy  | 1:100,000+                                                                                                                                                                                                                                                                                                                                                                                    |
| Units          | Qualitative categories                                                                                                                                                                                                                                                                                                                                                                        |
| Min / Max *    | 3 categories of historical land use types                                                                                                                                                                                                                                                                                                                                                     |
| Legend         | Areas with present of traditional (historical) land use – old mining areas, areas with dispersed settlements, traditional pasture areas, vineyards and orchard areas, agricultural mosaic-structure landscape<br>0 – areas without occurrence of traditional land use types<br>1 – occurrence of 1 type of traditional land use<br>2 - occurrence of at least 2 types of traditional land use |

|                |                                                                              |
|----------------|------------------------------------------------------------------------------|
| <b>37_GEOL</b> | <b>Significant geological and geomorphological sites</b>                     |
| Data source    | Landscape Atlas of the Slovak Republic                                       |
| Data accuracy  | 1:100,000+                                                                   |
| Units          | 0, 1 (presence)                                                              |
| Min / Max *    | --- (Individual elements)                                                    |
| Legend         | Individual features representing location of important caves, geological and |

|  |                                                                       |
|--|-----------------------------------------------------------------------|
|  | geomorphological sites - buffer 200 m.<br>0 - absence<br>1 - presence |
|--|-----------------------------------------------------------------------|

|                 |                                                                                                                          |
|-----------------|--------------------------------------------------------------------------------------------------------------------------|
| <b>38_PARKS</b> | <b>Historical parks and gardens</b>                                                                                      |
| Data source     | Landscape Atlas of the Slovak Republic                                                                                   |
| Data accuracy   | 1:100,000+                                                                                                               |
| Units           | 0, 1 (presence)                                                                                                          |
| Min / Max *     | ---- (Individual elements)                                                                                               |
| Legend          | Individual features representing location of historical parks and gardens - buffer 150 m.<br>0 - absence<br>1 - presence |

|                 |                                                                                                                                                                                                                                                                                                                                                                                                                                                                                         |
|-----------------|-----------------------------------------------------------------------------------------------------------------------------------------------------------------------------------------------------------------------------------------------------------------------------------------------------------------------------------------------------------------------------------------------------------------------------------------------------------------------------------------|
| <b>39_ATRAC</b> | <b>Cultural and historical attractions and monuments</b>                                                                                                                                                                                                                                                                                                                                                                                                                                |
| Data source     | Landscape Atlas of the Slovak Republic                                                                                                                                                                                                                                                                                                                                                                                                                                                  |
| Data accuracy   | 1:100,000+                                                                                                                                                                                                                                                                                                                                                                                                                                                                              |
| Units           | Qualitative categories                                                                                                                                                                                                                                                                                                                                                                                                                                                                  |
| Min / Max *     | 4 categories of the occurrence                                                                                                                                                                                                                                                                                                                                                                                                                                                          |
| Legend          | Classification of cadastre areas in terms of occurrence of cultural and historical monuments (castle, chateau, museum, other historical buildings):<br>0 – cad. areas without occurrence of cultural and historical monuments<br>1 - cad. areas with occurrence of cultural and historical monuments (1-10)<br>2 – cad. areas with high occurrence of cultural and historical monuments (11-100)<br>3 - cad. areas with very high abundance of cultural and historical monuments (100+) |

|                |                                                                                                                                                                                                                                                                                                                                                                                  |
|----------------|----------------------------------------------------------------------------------------------------------------------------------------------------------------------------------------------------------------------------------------------------------------------------------------------------------------------------------------------------------------------------------|
| <b>40_RECR</b> | <b>Recreation and tourism objects</b>                                                                                                                                                                                                                                                                                                                                            |
| Data source    | Landscape Atlas of the Slovak Republic                                                                                                                                                                                                                                                                                                                                           |
| Data accuracy  | 1:100,000+                                                                                                                                                                                                                                                                                                                                                                       |
| Units          | Qualitative categories                                                                                                                                                                                                                                                                                                                                                           |
| Min / Max *    | 3 categories of the occurrence                                                                                                                                                                                                                                                                                                                                                   |
| Legend         | Classification of cadastre areas in terms of occurrence of recreational and tourism objects (individual objects – cabins, cottages; commercial objects)<br>0 – cad. areas without occurrence of recreational and tourism objects<br>1 – cad. areas with occurrence of recreational and tourism objects<br>2 - cad. areas with high abundance of recreational and tourism objects |
